# Supplementary material
Source: PubMed Central journal article supplement (PMC2780927)
Supplement: mmi0070-1246-SD1.pdf [file mmi0070-1246-SD1.pdf]

## Data S1

### N-terminus: acetyl

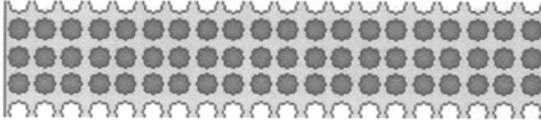

Ssa1 array

|                  |                   |                  |                   |
|------------------|-------------------|------------------|-------------------|
| 1 SKAVGIDLGTYS   | 16 VLRIINEPTAAAI  | 31 EIVLVGGSTRIPK | 46 TQKITITNDKGRLL |
| 2 YSSVAHFANDRVE  | 17 AIAYGLDKKGSRG  | 32 PKIQKLVSDFFNG | 47 RLSKEEIDKRVSE  |
| 3 VEI IANDQGNRTT | 18 RGEHNVLI FDLGG | 33 NGKELNKSINPDE | 48 SEAEKFKEEDEKE  |
| 4 TTPSFVAFTDTER  | 19 GGGTFDVSLLAID  | 34 DEAVAYGAAVQAA | 49 KEARVQAKNQLE   |
| 5 ERLIGDAAKNQAA  | 20 IDEGIFEVKATAG  | 35 AAILTGDTSSTQ  | 50 LESYAYSLKNTIN  |
| 6 AAMNPANTVFDAK  | 21 AGDTHLGGEDFDN  | 36 TQDILLLDVAPLS | 51 INDGEMKDKIGAD  |
| 7 AKRLIGRKFDDEPE | 22 DNRLVNFFIQEFK  | 37 LSLGIETAGGIMT | 52 ADDKEKLTKAIDE  |
| 8 PEVINDAKHFFPK  | 23 FKRNKKDISTNQ   | 38 MTKLIPRNSTIPT | 53 DETISWLDASQAA  |
| 9 FKVIDKAGKPVIQ  | 24 NQRALRRRLTASE  | 39 PTKKSETFSTYAD | 54 AASTEYEDKRKE   |
| 10 IQVEYKGETKTF  | 25 SERAKRTLSSSAQ  | 40 ADNQPGVLIQVFE | 55 KELESVANPIISG  |
| 11 FSPEEISSMVLTK | 26 AQTSEIDSLYEG   | 41 FEGERAKTKDNNL | 56 SGAYGAAGGAPGG  |
| 12 TKMKEIAEGYLG  | 27 EGIDFYTSITRFR  | 42 NLLGKFELSGIPP | 57 GGAGGPPGAGGPP  |
| 13 GSTVKDAVTVPA  | 28 ARFEELSADLFRS  | 43 PPAPRGVPQIEVT | 58 FPGGAPGAGGPPG  |
| 14 PAYFNDSQRQATK | 29 RSTLDPVGVKVLAD | 44 VTFDIDANGILNV | 59 GGATGGESSGPTV  |
| 15 TKDAGTIAGLNVL | 30 ADAKIDKSQVEEI  | 45 NVSALEKGTGKTQ | 60 GGESSGPTVEEVD  |

### N-terminus: acetyl

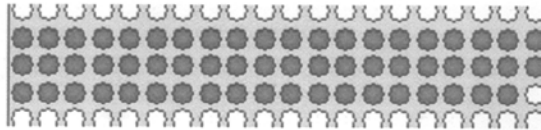

Ssa2 array

|                  |                   |                  |                   |
|------------------|-------------------|------------------|-------------------|
| 1 SKAVGIDLGTYS   | 16 VMRIINEPTAAAI  | 31 IVLVGGSTRIPKV | 46 QKITITNDKGRLL  |
| 2 YSSVAHFANDRVE  | 17 AIAYGLDKKSEAE  | 32 KVQKLVSDYFNGK | 47 LSKEEIEKRVSEA  |
| 3 VEI IANDQGNRTT | 18 AEKNVLI FDLGGG | 33 GKEPNRSINPDEA | 48 EAEKFKEEDEKEA  |
| 4 TTPSFVAFTDTER  | 19 GGGTFDVSLLSIED | 34 EAVAYGAAVQAAI | 49 EASRVQAKNQLES  |
| 5 ERLIGDAAKNQAA  | 20 EDGIFEVKATAGD  | 35 AILSGDTSSTQD  | 50 ESYAYSLKNTLGE  |
| 6 AAMNPANTVFDAK  | 21 GDTHLGGEDFDNR  | 36 QDLLLLDVAPLSL | 51 GEEQFKSKLDASE  |
| 7 AKRLIGRKFDDEHE | 22 NRLVNFFIQEFKR  | 37 SLGIETAGGIMTK | 52 SEIEEVTKAADET  |
| 8 HEVQGDIKHFFPK  | 23 KRKNKKDISTNQR  | 38 TKLIPRNSTIPTK | 53 ETIAWLDSNQATAT |
| 9 FKVVDKASKPMIQ  | 24 QRALRRRLTASER  | 39 TKKSETFSTYADN | 54 ATQEEFADQQKEL  |
| 10 IQVEYKGETKTF  | 25 ERAKRTLSSSAQT  | 40 DNQPGVLIQVFEG | 55 ELESKANPIMTKA  |
| 11 FSPEEISSMILGK | 26 QTSIEIDSLYEGI  | 41 EGERAQTKDNNLL | 56 KAYQAGATPSGAA  |
| 12 GKMKETAEGFLGT | 27 GIDFYTSITRFRF  | 42 LLGKFELSGIPPA | 57 AAGAAPPGGPPGGA |
| 13 GTTVKDAVTVPA  | 28 RFEELSADLFRST  | 43 PAPRGVPQIEVTF | 58 GAAPEPSNDGPTV  |
| 14 PAYFNDSQRQATK | 29 STLEPVDKVLSDA  | 44 TFDIDANGILNVS | 59 EPSNDGPTVEEVD  |
| 15 TKDAGTIAGLNVM | 30 DAKIDKSKVDEIV  | 45 VSALEKGTGKTQK |                   |
